# Supplementary material for: OCT and ERG Techniques in High-Throughput Phenotyping of Mouse Vision
Source: MDPI journal article supplement (doi:10.3390/genes14020294), 2023-01-22
Supplement: s1 [file s1]

**Supplementary Table S1.** List of single-gene knock out mouse lines which underwent vision tests in the Czech Centre for Phenogenomics between years 2018 – 2022 as part of the IMPC phenotyping project. Genes are sorted alphabetically, zygosity is stated as “Hom” homozygous, “Het” heterozygous and “Hem” hemizygous, respectively. The phenotyping of some lines was not yet finished at the time of publishing (marked as “TBC”, “to be completed”); meaning that the examination was carried out in less than 14 individuals (7 males + 7 females). In these lines the results should be understood as preliminary and taken with caution. Anterior eye segment was examined by Pentacam Scheimpflug camera (OCULUS Optikgeräte, Germany) and evaluated by an experienced examiner as normal or abnormal with respect to the lens and cornea opacity and their overall morphology. Retinal superficial vasculature and the retina as such were assessed from fundus images and retinal cross sections, respectively, obtained by Spectralis SD-OCT (Heidelberg Engineering, Germany). The examiner evaluated number of vessels and their structure and pattern as normal or abnormal for each eye. Similarly, the retina was classified as normal or abnormal based on its overall morphology, obvious thinning or thickening, or presence of a substantial proportion of dysplasia. The number of normal and abnormal cases of the anterior segment, the retina and its vasculature were statistically compared to wild type values by Fisher’s exact test with the threshold p-value set to 0.05. Non-significant results are displayed as “ns”. ERG was recorded in selected mouse lines with RETI-animal system (Roland-Consult, Germany). For the purpose of this table the amplitudes of scotopic waves a and b evoked by single flashes of 10 cd.s.m<sup>-2</sup> luminance were compared to wild type controls by unpaired t-test. Abnormality is reported for p < 0.05 obtained in either test. “NA” stands for lines that were not tested in ERG.

| Gene          | Zygosity | Phenotyping finished | Anterior segment | Blood vessels | Retina   | ERG |
|---------------|----------|----------------------|------------------|---------------|----------|-----|
| 0610040J01Rik | Hom      | Yes                  | ns               | ns            | ns       | ns  |
| 1810011H11Rik | Hom      | Yes                  | Abnormal         | ns            | ns       | NA  |
| 1810041L15Rik | Hom      | Yes                  | ns               | Abnormal      | ns       | NA  |
| 3425401B19Rik | Hom      | Yes                  | Abnormal         | ns            | ns       | NA  |
| Abca5         | Hom      | TBC                  | ns               | Abnormal      | ns       | NA  |
| Abtb1         | Hom      | Yes                  | ns               | ns            | ns       | NA  |
| Ace2          | Hem      | Yes                  | Abnormal         | Abnormal      | Abnormal | NA  |
| Adk           | Het      | Yes                  | ns               | ns            | ns       | NA  |
| Agpat5        | Hom      | Yes                  | ns               | ns            | ns       | NA  |
| Aim2          | Hom      | Yes                  | ns               | ns            | ns       | NA  |
| Ak7           | Het      | Yes                  | ns               | ns            | ns       | ns  |
| Amelx         | Hem      | Yes                  | Abnormal         | ns            | ns       | NA  |
| Ano2          | Hom      | Yes                  | ns               | ns            | ns       | NA  |
| Anxa1         | Hom      | Yes                  | ns               | ns            | ns       | NA  |
| Apbb1ip       | Hom      | Yes                  | ns               | ns            | ns       | ns  |
| Apobec1       | Hom      | Yes                  | ns               | ns            | ns       | NA  |
| Arg2          | Hom      | Yes                  | ns               | ns            | ns       | ns  |
| Arl16         | Hom      | Yes                  | ns               | ns            | ns       | NA  |
| Asb1          | Hom      | Yes                  | Abnormal         | ns            | ns       | NA  |
| Asb16         | Hom      | Yes                  | Abnormal         | ns            | ns       | NA  |
| Asb4          | Hom      | Yes                  | ns               | ns            | ns       | NA  |
| Asb5          | Hom      | Yes                  | Abnormal         | Abnormal      | ns       | NA  |
| Asb7          | Hom      | Yes                  | Abnormal         | ns            | ns       | NA  |
| Ascl5         | Hom      | Yes                  | ns               | ns            | ns       | NA  |
| Asphd1        | Hom      | Yes                  | ns               | ns            | ns       | NA  |
| Ate1          | Het      | TBC                  | ns               | ns            | ns       | NA  |
| Atf2          | Het      | Yes                  | ns               | ns            | ns       | NA  |
| Atg7          | Het      | Yes                  | ns               | ns            | Abnormal | NA  |
| Atp1a1        | Het      | Yes                  | ns               | ns            | ns       | NA  |
| Babam1        | Hom      | Yes                  | Abnormal         | ns            | ns       | NA  |
| Bbip1         | Het      | Yes                  | ns               | ns            | Abnormal | ns  |
| Bbs12         | Het      | Yes                  | Abnormal         | ns            | ns       | NA  |

|         |     |     |          |          |          |          |
|---------|-----|-----|----------|----------|----------|----------|
| Birc6   | Het | Yes | ns       | ns       | Abnormal | NA       |
| Bmp6    | Hom | Yes | ns       | ns       | ns       | NA       |
| Brinp3  | Hom | Yes | Abnormal | ns       | ns       | NA       |
| Btbd1   | Hom | Yes | ns       | ns       | ns       | NA       |
| Btbd18  | Hom | Yes | Abnormal | ns       | ns       | NA       |
| Btbd7   | Hom | Yes | Abnormal | ns       | ns       | Abnormal |
| Btbd8   | Hom | Yes | ns       | Abnormal | ns       | NA       |
| Bysl    | Het | Yes | ns       | ns       | ns       | NA       |
| Cabin1  | Het | Yes | ns       | Abnormal | ns       | NA       |
| Cactin  | Het | Yes | ns       | ns       | ns       | NA       |
| Calb1   | Hom | Yes | ns       | ns       | Abnormal | ns       |
| CamK4   | Hom | Yes | ns       | ns       | ns       | NA       |
| Canx    | Hom | TBC | ns       | ns       | ns       | NA       |
| Car6    | Hom | Yes | Abnormal | ns       | Abnormal | Abnormal |
| Card11  | Hom | Yes | Abnormal | ns       | ns       | NA       |
| Casp14  | Hom | Yes | ns       | ns       | ns       | NA       |
| Ccdc110 | Hom | TBC | ns       | ns       | ns       | NA       |
| Ccdc198 | Hom | Yes | ns       | Abnormal | ns       | NA       |
| Ccl28   | Hom | Yes | ns       | ns       | ns       | NA       |
| Ccr3    | Hom | Yes | Abnormal | ns       | ns       | NA       |
| Cd27    | Hom | Yes | ns       | Abnormal | ns       | ns       |
| Cd38    | Hom | Yes | ns       | ns       | ns       | NA       |
| Cer1    | Hom | Yes | ns       | ns       | ns       | ns       |
| Chfr    | Hom | TBC | ns       | ns       | ns       | NA       |
| Chuk    | Het | Yes | ns       | ns       | ns       | NA       |
| Churc1  | Hom | Yes | ns       | ns       | ns       | NA       |
| Clnk    | Hom | Yes | Abnormal | ns       | ns       | NA       |
| Clock   | Hom | Yes | ns       | ns       | ns       | NA       |
| Cngb3   | Hom | TBC | ns       | ns       | ns       | NA       |
| Cnpy2   | Hom | Yes | ns       | ns       | ns       | NA       |
| Cnpy4   | Hom | Yes | ns       | ns       | ns       | NA       |
| Coa6    | Het | Yes | ns       | ns       | ns       | NA       |
| Cobll1  | Hom | TBC | ns       | ns       | ns       | NA       |
| Cog5    | Het | Yes | ns       | ns       | ns       | NA       |
| Cops8   | Het | TBC | ns       | ns       | ns       | NA       |
| Crocc2  | Hom | TBC | ns       | ns       | ns       | NA       |
| Crx     | Hom | Yes | ns       | ns       | Abnormal | Abnormal |
| Cst6    | Het | Yes | Abnormal | ns       | Abnormal | NA       |
| Cul4a   | Hom | Yes | ns       | Abnormal | Abnormal | NA       |
| Cul9    | Hom | Yes | ns       | ns       | Abnormal | NA       |
| Cyp39a1 | Hom | Yes | ns       | Abnormal | ns       | NA       |
| Dach2   | Hom | TBC | ns       | ns       | ns       | NA       |
| Dazap1  | Het | Yes | Abnormal | ns       | Abnormal | NA       |
| Dcaf12  | Hom | Yes | ns       | Abnormal | Abnormal | NA       |
| Dcaf15  | Hom | TBC | Abnormal | Abnormal | Abnormal | NA       |
| Dcaf5   | Hom | TBC | ns       | ns       | Abnormal | NA       |
| Dcaf8   | Hom | Yes | ns       | ns       | Abnormal | NA       |
| Ddb1    | Het | Yes | ns       | ns       | ns       | NA       |
| Ddi2    | Het | Yes | ns       | Abnormal | ns       | NA       |
| Dtx4    | Het | Yes | ns       | Abnormal | ns       | NA       |
| Emsy    | Het | Yes | ns       | ns       | ns       | NA       |

|          |     |     |          |          |          |          |
|----------|-----|-----|----------|----------|----------|----------|
| Fam120c  | Hom | Yes | ns       | ns       | ns       | NA       |
| Fam122b  | Hem | Yes | ns       | ns       | ns       | ns       |
| Fam124a  | Hom | Yes | ns       | ns       | ns       | NA       |
| Fam126a  | Hom | Yes | Abnormal | Abnormal | ns       | NA       |
| Fam129a  | Hom | Yes | ns       | ns       | ns       | NA       |
| Fam160b2 | Hom | Yes | ns       | ns       | ns       | NA       |
| Fam161b  | Hom | Yes | ns       | ns       | ns       | NA       |
| Fam167a  | Hom | Yes | ns       | Abnormal | ns       | ns       |
| Fam185a  | Hom | Yes | ns       | ns       | ns       | NA       |
| Fam205c  | Hom | Yes | ns       | ns       | ns       | NA       |
| Fam208a  | Het | Yes | ns       | ns       | ns       | NA       |
| Fam219a  | Hom | Yes | ns       | ns       | ns       | NA       |
| Fam221a  | Hom | Yes | ns       | ns       | ns       | NA       |
| Fam227b  | Hom | TBC | ns       | ns       | ns       | NA       |
| Fam45a   | Hom | Yes | ns       | ns       | ns       | NA       |
| Fam46a   | Hom | Yes | Abnormal | ns       | ns       | NA       |
| Fam53a   | Hom | Yes | ns       | ns       | ns       | NA       |
| Fam60a   | Het | Yes | ns       | ns       | ns       | NA       |
| Fam71d   | Hom | Yes | ns       | ns       | ns       | NA       |
| Fam71f1  | Hom | Yes | ns       | ns       | ns       | NA       |
| Fam71f2  | Hom | Yes | ns       | ns       | ns       | NA       |
| Fam81a   | Hom | Yes | ns       | ns       | ns       | NA       |
| Fam83d   | Hom | Yes | ns       | ns       | ns       | NA       |
| Fam83h   | Hom | Yes | ns       | ns       | ns       | NA       |
| Fam84b   | Hom | Yes | ns       | ns       | Abnormal | Abnormal |
| Fam96b   | Het | Yes | ns       | ns       | Abnormal | NA       |
| Fat3     | Hom | TBC | ns       | ns       | ns       | NA       |
| Fbxl3    | Hom | Yes | ns       | ns       | Abnormal | Abnormal |
| Fbxo25   | Hom | Yes | ns       | ns       | ns       | NA       |
| Fbxw15   | Hom | Yes | ns       | ns       | ns       | NA       |
| Fbxw16   | Het | Yes | ns       | ns       | ns       | NA       |
| Fbxw18   | Het | Yes | Abnormal | Abnormal | ns       | NA       |
| Fbxw20   | Hom | Yes | ns       | ns       | ns       | NA       |
| Fbxw25   | Hom | TBC | ns       | ns       | ns       | NA       |
| Fgd3     | Hom | Yes | ns       | ns       | ns       | NA       |
| Fgf14    | Hom | Yes | ns       | ns       | ns       | NA       |
| Fgf20    | Hom | Yes | Abnormal | ns       | ns       | NA       |
| Flt3     | Hom | Yes | ns       | ns       | ns       | NA       |
| Fnip1    | Hom | TBC | ns       | ns       | ns       | NA       |
| Gabra5   | Hom | Yes | ns       | ns       | ns       | NA       |
| Gak      | Het | TBC | ns       | ns       | ns       | NA       |
| Gdf6     | Het | Yes | ns       | Abnormal | Abnormal | Abnormal |
| Gm10851  | Hom | Yes | ns       | ns       | ns       | NA       |
| Gm20219  | Hom | TBC | ns       | ns       | ns       | NA       |
| Gm5148   | Het | Yes | ns       | ns       | ns       | NA       |
| Gpatch4  | Hom | TBC | ns       | ns       | ns       | NA       |
| Gpr109   | Hom | Yes | ns       | ns       | ns       | NA       |
| Gpr81    | Hom | Yes | ns       | ns       | ns       | NA       |
| Gpr83    | Hom | Yes | ns       | ns       | ns       | ns       |
| Gulo     | Hom | TBC | ns       | ns       | Abnormal | NA       |
| Hcls1    | Hom | TBC | ns       | ns       | ns       | NA       |

|          |     |     |          |          |          |    |
|----------|-----|-----|----------|----------|----------|----|
| Hdac4    | Het | Yes | ns       | Abnormal | ns       | NA |
| Hormad2  | Hom | TBC | ns       | ns       | ns       | NA |
| Impact   | Hom | TBC | ns       | ns       | ns       | NA |
| Insig1   | Hom | Yes | Abnormal | ns       | Abnormal | NA |
| Irak4    | Hom | TBC | ns       | ns       | ns       | NA |
| Itgb6    | Hom | Yes | ns       | ns       | ns       | NA |
| Kbtbd11  | Hom | Yes | ns       | ns       | ns       | NA |
| Kbtbd3   | Hom | Yes | ns       | ns       | ns       | NA |
| Kcnn4    | Hom | Yes | ns       | ns       | ns       | NA |
| Kif16b   | Hom | Yes | ns       | ns       | ns       | NA |
| Kif6     | Hom | Yes | ns       | ns       | ns       | NA |
| Klhl1    | Hom | Yes | ns       | ns       | ns       | NA |
| Klhl6    | Hom | TBC | ns       | ns       | ns       | NA |
| Klk11    | Hom | Yes | ns       | ns       | ns       | NA |
| Klk12    | Hom | Yes | ns       | ns       | ns       | NA |
| Klk13    | Hom | Yes | ns       | Abnormal | Abnormal | NA |
| Klk15    | Hom | Yes | ns       | ns       | ns       | NA |
| Klk8     | Hom | Yes | Abnormal | ns       | ns       | NA |
| Krt1     | Hom | TBC | ns       | ns       | ns       | NA |
| Krt27    | Hom | Yes | ns       | ns       | ns       | NA |
| Krt28    | Hom | Yes | ns       | ns       | ns       | NA |
| Krt33a   | Hom | Yes | ns       | ns       | ns       | NA |
| Krt33b   | Hom | Yes | ns       | ns       | ns       | NA |
| Krt34    | Hom | TBC | Abnormal | ns       | ns       | NA |
| Krt72    | Hom | Yes | ns       | ns       | ns       | NA |
| Krtap7   | Hom | Yes | Abnormal | ns       | ns       | NA |
| Krtap8-1 | Hom | Yes | ns       | ns       | Abnormal | NA |
| Krtap9-5 | Hom | Yes | ns       | ns       | ns       | NA |
| Lamtor4  | Het | Yes | Abnormal | ns       | Abnormal | NA |
| Lgr6     | Hom | Yes | ns       | ns       | ns       | NA |
| Lhx5     | Het | Yes | ns       | ns       | ns       | NA |
| Lrig3    | Hom | TBC | ns       | ns       | ns       | NA |
| Lrrc17   | Hom | Yes | ns       | ns       | ns       | NA |
| Ltn1     | Hom | Yes | Abnormal | Abnormal | ns       | NA |
| Mapkapk3 | Hom | Yes | ns       | ns       | ns       | NA |
| Marchf3  | Hom | Yes | ns       | Abnormal | ns       | NA |
| Marveld3 | Hom | Yes | ns       | Abnormal | ns       | NA |
| Meis3    | Hom | Yes | ns       | ns       | ns       | NA |
| Mex3b    | Hom | Yes | ns       | ns       | ns       | NA |
| Mfng     | Hom | Yes | Abnormal | ns       | ns       | ns |
| Mmp20    | Hom | Yes | ns       | ns       | ns       | NA |
| Mpp1     | Hom | TBC | Abnormal | ns       | ns       | NA |
| Myo1g    | Hom | Yes | ns       | ns       | ns       | NA |
| Naa38    | Het | Yes | Abnormal | ns       | ns       | NA |
| Nfam1    | Hom | Yes | ns       | ns       | ns       | NA |
| Nfe2l2   | Hom | TBC | ns       | ns       | ns       | NA |
| Nmi      | Hom | TBC | ns       | ns       | ns       | NA |
| Nsmce1   | Het | Yes | ns       | Abnormal | Abnormal | NA |
| Nuggc    | Hom | Yes | ns       | ns       | ns       | ns |
| Nwd2     | Hom | Yes | ns       | Abnormal | ns       | NA |
| Nxn12    | Het | TBC | ns       | ns       | ns       | NA |

|         |     |     |          |          |          |          |
|---------|-----|-----|----------|----------|----------|----------|
| Oas1c   | Hom | Yes | ns       | ns       | ns       | NA       |
| Odaph   | Hom | Yes | ns       | Abnormal | ns       | NA       |
| Odf3b   | Hom | Yes | ns       | ns       | ns       | NA       |
| Otop1   | Hom | TBC | ns       | ns       | ns       | NA       |
| Pank2   | Hom | TBC | ns       | ns       | ns       | NA       |
| Papd7   | Hom | Yes | ns       | ns       | ns       | NA       |
| Pcid2   | Het | TBC | ns       | ns       | ns       | NA       |
| Pdgfd   | Hom | Yes | ns       | Abnormal | ns       | NA       |
| Pdgfra  | Het | TBC | ns       | Abnormal | ns       | NA       |
| Pgc     | Hom | TBC | ns       | ns       | ns       | NA       |
| Pglyrp4 | Hom | Yes | ns       | ns       | ns       | NA       |
| Pknox2  | Hom | Yes | ns       | Abnormal | Abnormal | NA       |
| Pla2g2f | Hom | Yes | ns       | Abnormal | ns       | NA       |
| Prdm8   | Hom | Yes | Abnormal | Abnormal | Abnormal | Abnormal |
| Prg4    | Hom | Yes | ns       | ns       | ns       | NA       |
| Proser2 | Hom | Yes | ns       | ns       | ns       | NA       |
| Prss12  | Hom | Yes | Abnormal | ns       | ns       | NA       |
| Prss21  | Het | Yes | ns       | ns       | ns       | NA       |
| Prss33  | Hom | Yes | ns       | ns       | ns       | NA       |
| Prss35  | Hom | Yes | ns       | ns       | ns       | NA       |
| Prss47  | Hom | Yes | ns       | Abnormal | ns       | NA       |
| Prss48  | Hom | Yes | ns       | ns       | ns       | ns       |
| Prss54  | Hom | Yes | ns       | ns       | ns       | NA       |
| Prss55  | Hom | Yes | ns       | Abnormal | ns       | NA       |
| Prss57  | Hom | Yes | ns       | ns       | ns       | NA       |
| Psen2   | Hom | Yes | ns       | Abnormal | Abnormal | NA       |
| Psmb11  | Hom | Yes | ns       | ns       | ns       | NA       |
| Pstpip1 | Hom | Yes | ns       | ns       | ns       | NA       |
| Ptchd4  | Hom | Yes | ns       | ns       | ns       | NA       |
| Rasgrp3 | Hom | Yes | ns       | ns       | Abnormal | NA       |
| Rffl    | Hom | Yes | ns       | Abnormal | Abnormal | NA       |
| Rhag    | Hom | Yes | ns       | ns       | ns       | NA       |
| Rnf128  | Hem | Yes | ns       | ns       | ns       | NA       |
| Rnf14   | Hom | Yes | Abnormal | ns       | ns       | NA       |
| Rnf148  | Hom | Yes | ns       | ns       | ns       | NA       |
| Rnf19b  | Hom | Yes | Abnormal | ns       | Abnormal | NA       |
| Rnf208  | Hom | Yes | ns       | ns       | ns       | NA       |
| Rnf223  | Hom | Yes | Abnormal | ns       | Abnormal | NA       |
| Rnf34   | Hom | TBC | ns       | ns       | ns       | NA       |
| Rnf4    | Het | Yes | ns       | Abnormal | ns       | NA       |
| Rnf5    | Het | Yes | ns       | ns       | ns       | NA       |
| Rnft1   | Hom | Yes | ns       | ns       | Abnormal | NA       |
| Ror1    | Het | Yes | ns       | Abnormal | ns       | NA       |
| Rras2   | Hom | Yes | ns       | ns       | ns       | NA       |
| Sall3   | Het | Yes | Abnormal | ns       | ns       | NA       |
| Sbsn    | Hom | Yes | ns       | ns       | ns       | NA       |
| Sbspon  | Hom | Yes | ns       | ns       | ns       | NA       |
| Scel    | Hom | Yes | Abnormal | ns       | ns       | NA       |
| Sla2    | Hom | Yes | ns       | ns       | ns       | NA       |
| Slc15a1 | Hom | TBC | ns       | ns       | ns       | NA       |
| Slc38a7 | Hom | TBC | Abnormal | ns       | ns       | ns       |

|         |     |     |          |          |          |          |
|---------|-----|-----|----------|----------|----------|----------|
| Slc38a8 | Hom | Yes | ns       | ns       | ns       | ns       |
| Sox14   | Hom | Yes | ns       | ns       | ns       | NA       |
| Spink13 | Hom | Yes | Abnormal | Abnormal | ns       | NA       |
| Spred1  | Hom | Yes | Abnormal | ns       | Abnormal | ns       |
| Spryd4  | Hom | Yes | ns       | Abnormal | Abnormal | NA       |
| Strip2  | Hom | Yes | ns       | ns       | Abnormal | NA       |
| Sult1a1 | Hom | Yes | ns       | ns       | ns       | NA       |
| Syng1   | Hom | TBC | Abnormal | ns       | ns       | NA       |
| Tcaf2   | Hom | TBC | ns       | ns       | ns       | NA       |
| Tekt1   | Hom | TBC | ns       | ns       | ns       | NA       |
| Thoc1   | Het | Yes | ns       | ns       | ns       | NA       |
| Tkfc    | Hom | TBC | Abnormal | ns       | ns       | NA       |
| Tmem240 | Hom | Yes | ns       | ns       | ns       | NA       |
| Tmem47  | Hem | Yes | ns       | ns       | ns       | NA       |
| Tmem60  | Hom | Yes | ns       | ns       | Abnormal | NA       |
| Tmem62  | Hom | Yes | ns       | ns       | ns       | NA       |
| Tnfr60  | Hom | Yes | ns       | ns       | ns       | ns       |
| Tomm6   | Het | Yes | ns       | ns       | ns       | NA       |
| Tppp3   | Het | TBC | ns       | ns       | Abnormal | NA       |
| Trim15  | Hom | Yes | ns       | ns       | ns       | NA       |
| Tyro3   | Hom | Yes | ns       | ns       | ns       | NA       |
| Ubd     | Hom | Yes | Abnormal | ns       | ns       | NA       |
| Ube2n   | Het | Yes | ns       | ns       | ns       | NA       |
| Ubl4b   | Hom | Yes | Abnormal | ns       | ns       | NA       |
| Uchl4   | Hom | Yes | ns       | ns       | ns       | NA       |
| Uox     | Het | TBC | ns       | ns       | ns       | NA       |
| Vamp4   | Hom | TBC | ns       | ns       | Abnormal | NA       |
| Vegfd   | Hom | Yes | Abnormal | ns       | ns       | NA       |
| Vnn3    | Hom | TBC | Abnormal | ns       | ns       | NA       |
| Wdr49   | Hom | Yes | ns       | ns       | ns       | NA       |
| Wdr63   | Hom | TBC | ns       | ns       | ns       | NA       |
| Wiz     | Het | Yes | ns       | ns       | Abnormal | ns       |
| Xrcc5   | Hom | TBC | ns       | Abnormal | Abnormal | Abnormal |
| Zc2HC1a | Hom | Yes | ns       | ns       | ns       | NA       |
| Zc2Hc1b | Hom | TBC | Abnormal | ns       | ns       | NA       |
| Zc2HC1c | Hom | Yes | ns       | ns       | ns       | NA       |
| Zc3h8   | Het | Yes | ns       | ns       | ns       | ns       |
| Zfat    | Het | Yes | ns       | ns       | ns       | NA       |
| Zfp474  | Hom | Yes | Abnormal | ns       | ns       | NA       |
| Zfp644  | Hom | Yes | ns       | ns       | ns       | NA       |

---
